### P-123 How to develop accurate Computer Assisted Sperm Analysis (CASA) AI in the absence of protocol standardization and abundance of human error when performing semen analyses?

Z. Simon<sup>1</sup>, R. Maillot<sup>1</sup>, M. Monteiro<sup>1</sup>, S. Rogers<sup>2</sup>, A. Mania<sup>3</sup>, L. Bjorndahl<sup>4</sup>, S. Homa<sup>5</sup>, D. Thomas<sup>1</sup>, M. Taha<sup>1</sup>

<sup>1</sup>mojo, Lyon, Lyon, France ;

<sup>2</sup>The Hospital Fertility Group, Alder Close, Eastbourne, United Kingdom ;

<sup>3</sup>Kings Fertility, London, London, United Kingdom ;

<sup>4</sup>ANOVA- Karolinska University Hospital, Stockholm, Stockholm, Sweden ;

<sup>5</sup>Kent University, Kent, Kent, United Kingdom

**Study question:** How can an automation & artificial intelligent tools be developed to perform according to WHO recommendations?

**Summary answer:** Developing CASA performs at < 20% error margin requires AI trained with high quality datasets and a robotic system adheres to WHO guidelines.

**What is known already:** A survey of 40 andrology laboratories, in 22 countries, revealed that > 90% had nonconformities in correct use of equipment, standardisation of protocols and quality control, leading to a lack of compliance to WHO protocols. Conventional CASA systems can standardize analysis, but controversy has occurred due to differences between manual and automated analyses stemming from: 1) all cells in a semen sample are detected including debris; 2) protocol variation when compared to top-notch manual analysis. The first point can be addressed by AI. The second point can be addressed by robotics designed to adhere to WHO guidelines.

**Study design, size, duration:** A mojo AISA (AI-powered semen analysis) system was placed in four clinical laboratories mentioned above capturing images of over 300 samples, one million images were generated over a course of 2 years. Mojo AISA's AI was trained on data collected from the four clinics using robotic system is developed according to WHO guidelines.

**Participants/materials, setting, methods:** For an AI to detect sperm accurately, sperm samples were captured using mojo AISA smart microscopy and then the extracted sperm images expertly annotated. To evaluate the system-ability for semen analysis, fresh sample were analysed for concentration and motility by a manual operator and compared to a mojo AISA test.

**Main results and the role of chance:** To train the sperm detection AI, representative sperm images were carefully captured using mojo AISA and processed according to the following criteria:

- the number of images and videos to train and to test the model: 50,000 spermatozoon head and tails with various variations
- the variety of images: data used to train the AI has to be representative of the population that will undergo the analysis: 1) wide concentration ranges from 0 to 300 M/ml, 2) high and low density of debris and cells, 3) Presence of slight aggregations
- careful and precise annotation: expert andrology scientists annotated sperm images and identify objects to exclude, such as debris in seminal plasma, Mojo AISA is an attempt strictly build CASA AI system to WHO-guidelines. The marriage of AI and robotics automation has shown a promising results to mimic humans when measuring a semen sample and attempt to obtain results comparable to the manual analysis.

mojo AISA's performance improved three-fold (from 0,85 to 0,95 Pearson sperm count correlation and from >100% means relative error to 25% mean relative error).

**Limitations, reasons for caution:** Lack of standardization for semen analysis laboratory process globally is a bottleneck towards building a robust multi-center study, on-site CASA testing and generating an actionable data pool for studying the causes behind male fertility decline. Wider implications of the findings: Key learnings for parties advancing developing AI based on images and videos for application in the fertility space.

**Trial registration number:** not applicable
